# Supplementary material
Source: Springer Nature journal article supplement (https://www.springermedizin.de/resource/supplementary/12865_2006_110_MOESM1_ESM.pdf/9428530)
Supplement: MOESM1 [file 9428530]

Sample numberLength of V3 region

10 TNELVLDLXLCLLLHKMLSLXLYVYFFLYXCWXLXQVICTGSLNLYYYDFTIVR- 54  
14 TMCLS-XLLFFLLHEMLSLGL-IYFLXYW-GGXCN-XVQNSFNLXQ-GF-NLP- 48  
1 TMCLSYISWLFVLSYK-LSLGPIGTFLVVLWGPVTVDYYRIHSVGTIRV-HWL- 52  
2 TMCLSYISWLLVLSYKLLSLGPIGCLFLVVLWGPVTVDYYRIHSVGTIRV-HWL- 53  
6 TMCLSYISWLFVLSYK-LSLGPICTFLSVLWFPVTVDYYRIHSVGTIRV-HWL- 52  
3 TMCLSYISCYLSYCMKCS PW-XMYALXYIFVGXCTIXFYRFXQLXYYXL-SIVT 53  
4 TVCFSYISYYFSTCIKCPW-XMYASYCIGXG SCTXDFYRFIQLYYYDL-SIGG 53  
8 TMCLS ISCXLSCHINCSPW-SYRHXFPCXXIGXCTXDYYRFIPXYYYGL-TLFV 53  
12 TMCLSYISCXLSCHINCSPW-SYRDXFPCAXIGXCTXDYYRFIPXYYYAL-TFFV 53  
7 -TIWSYISFYSSCCMKCS PWXLYVLSFFXYWCWVXYXNFYRFISCTLWFX-HCS- 52  
5 TVCLSYISYYFSWLYTILSL-VLELPFFLXWXWVLYN-LLQIXSAVLNGF-SMSE 52  
11 TVCLSYISYYFSWLLTILSL-VLELDFFLXWX-VLYN-LLQIXSAVLNSF-SMSE 51  
9 TMCLSYSXYGLLVHTILVP-XLYVHLFLYCCWVLYX-LLXEIQLYYXGF-SXVR 52  
13 -----IFPFIPPVA-XALXPICIIILLCIWLLGLVQLISTXSF SCTIMGLALFM- 48
